# Supplementary material
Source: publisher figshare collection journal article supplement (https://gsajournals.figshare.com/ndownloader/files/22398030)
Supplement: Supplementary file 1 [file 22398030]

## Sheet: Sheet1
S9 Table: Common genes between Cr41 treatments with different media conditions
GSY-YM_Cr41	GSY-WYF_Cr41	GSY_common_Cr41_treatments (i.e., with and without WYF)					RM11-YM_Cr41	RM11-WYF_Cr41	RM11_common_Cr41_treatments (i.e., with and without WYF)							GSY_common_Cr41_treatments (i.e., with and without WYF)	RM11_common_Cr41_treatments (i.e., with and without WYF)	common_between the common of the two strains treated
YSW1	HHO1	YSW1					SPS100	GRE1	SPS100							YSW1	SPS100	HBT1
AGP1	GAS3	ITR1					GRE1	YPR127W	GRE1							ITR1	GRE1	PIR3
ITR1	GIC1	ATG41					PIR3	NQM1	PIR3							ATG41	PIR3	SHC1
YAT2	PCL1	ADH5					TKL2	GIT1	TKL2							ADH5	TKL2	NQM1
ARG5,6	TOS6	HBT1					SIP18	SPS100	SIP18							HBT1	SIP18	BAG7
TMT1	YGR153W	STR3					FMP16	GND2	FMP16							STR3	FMP16	TKL2
HIS5	STU2	CTR2					NQM1	PMA2	NQM1							CTR2	NQM1	SPS100
NIT1	SRL1	RPB11					CTR3	FMP16	CTR3							RPB11	CTR3	FMP16
CPA2	SPC97	TOS6					CYC7	SHC1	ALD3							TOS6	ALD3	CTT1
SRY1	CIS3	ASK10					ALD3	SIP18	PMA2							ASK10	PMA2	GRE1
ARG7	YHP1	BSC5					NA	HBT1	PAI3							BSC5	PAI3	ALD3
SNZ1	HTB2	RTC2					PMA2	SUL1	SHC1							RTC2	SHC1	GND2
LEU4	CLB2	TOS4					PAI3	ALD3	HBT1							TOS4	HBT1	NCA3
ACC1	HHF2	SVS1					SHC1	ICS2	NCA3							SVS1	NCA3	SOL4
ARG1	SIM1	SPO21					HBT1	YPL278C	GND2							SPO21	GND2	SIP18
GPD2	SCW10	PSD1					YHR022C	MSC1	CTR1							PSD1	CTR1
FAS2	HHF1	GAS1					NCA3	NCA3	BAG7							GAS1	BAG7
ATG41	AIM34	SRS2					YGL117W	CTT1	SOL4							SRS2	SOL4
ASN1	BUD4	SAM2					SNZ1	GRE2	HXT5							SAM2	HXT5
ADH5	YJL118W	THI7					GND2	LEE1	CTT1							THI7	CTT1
CHO2	INO1	FET4					CTR1	HPF1	ZNF1							FET4	ZNF1
ATG1	VAC17	FMP23					SPG4	BAG7	LEE1							FMP23	LEE1
TRP3	YOX1	YRO2					BAG7	POT1	HPF1							YRO2	HPF1
YNR068C	WSC2	OST3					NDE2	PIR3	MMP1							OST3	MMP1
HBT1	FKH1	RNR1					SOL4	YJR061W	HXT6							RNR1	HXT6
CDC20	CLB1	YGP1					RTC2	YPL277C	CUP1-1							YGP1	CUP1-1
SDT1	SRS2	PIR3					HXT5	RTN2	GIT1							PIR3	GIT1
RIB5	HTA2	ESP1					HPA2	TKL2	YHR022C							ESP1	YHR022C
FAS1	PDS1	CRH1					ADH5	MMP1								CRH1
URA2	CSI2	RRT5					OM45	PAI3								RRT5
YNR065C	NUD1	LYS20					AGP1	YRO2								LYS20
STR3	ALK1	THI20					YAT2	YCL048W-A								THI20
STR2	NRM1	HHO1					CTT1	YDL218W								HHO1
CTR2	SVS1	HSL1					YMR317W	YJL045W								HSL1
BAP2	FDO1	HOM3					FES1	CTR1								HOM3
RPB11	MCD1	MSH6					DAL5	CTR3								MSH6
PXP2	SWI5	SHC1					PUT1	DSF1								SHC1
TOS6	TUB1	HO					HXT8	YGR201C								HO
YGL117W	PLM2	SWE1					YHR052W-A	HXT5								SWE1
ASK10	PRY2	POL2					YNL034W	SOL4								POL2
BSC5	FRK1	RAD27					FET3	CUP1-1								RAD27
RTC2	TOS4	NQM1					ZNF1	YNL195C								NQM1
TOS4	HOF1	PDS5					TMA10	CSS1								PDS5
SVS1	SWE1	MCD4					PTR2	MAN2								MCD4
SPO21	ACM1	LEU2					LEE1	FMP33								LEU2
PSD1	HSL1	DDR2					HSP30	AQY1								DDR2
HNM1	GIN4	HSP12					APJ1	DIA3								HSP12
GGC1	RTT107	HEK2					HPF1	ZNF1								HEK2
GAS1	RNR1	PET18					MMP1	YKL107W								PET18
TEA1	CDC21	REC102					HXT6	YDL241W								REC102
HIS7	PLB2	IRR1					ARN1	HXT6								IRR1
SRS2	YOR114W	HTA2					YLL053C	YHR022C								HTA2
SUR1	SUT2	SCW10					CUP1-1	SHH3								SCW10
PKP2	ECM33	GAS3					FRE5									GAS3
CLG1	SHE1	CIN8					GIT1									CIN8
ALD5	HO	YCS4					FIT2									YCS4
ILV2	YDL211C	THI2					FIT3									THI2
SNQ2	CIK1	HTA1					BTN2									HTA1
SKP2	HES1	TCB2														TCB2
SAM2	YPS3	ECM13														ECM13
THI7	YCS4	PDR12														PDR12
FET4	ALK2	STU2														STU2
HIS4	AXL2	TUB1														TUB1
ATP19	PGM1	MYO2														MYO2
YIL024C	YSY6	RFC3														RFC3
GAS2	KAR3	ECM33														ECM33
FMP23	DUN1	PMI40														PMI40
OAC1	PDS5	SMC3														SMC3
UGA3	KIP1	CHO1														CHO1
YRO2	SPC29	ELO2														ELO2
GDH1	VIK1	MCD1														MCD1
GLN3	CHS2	INM1														INM1
MNN1	CLN1	NDD1														NDD1
OST3	BRN1	HSP26														HSP26
GGA2	CDC5	HTB2														HTB2
RNR1	AIM20	SPC97														SPC97
PCL5	GIC2	PHO3														PHO3
YGP1	SGO1	POL1														POL1
GRX4	CIN8	BUD3														BUD3
PIR3	FIR1	PRY2														PRY2
PYC2	ICS3	BAG7														BAG7
VPS1	CRH1	CDC45														CDC45
ESP1	PMI40	CLN1														CLN1
ARG4	CLN2	CSI2														CSI2
HOM2	YBR138C	RFA3														RFA3
CRH1	RNH201	PCL1														PCL1
SSU1	SMP1	GIN4														GIN4
MCT1	HHT2	FDO1														FDO1
CCP1	FET3	SKG6														SKG6
YBR071W	SFG1	RTT107														RTT107
ARO3	RFA3	CPT1														CPT1
DIP5	RAD27	ERP3														ERP3
RRT5	TOS1	SIM1														SIM1
ECM21	CIN2	PST1														PST1
LYS20	RTT109	YIG1														YIG1
THI20	CSN9	CIS3														CIS3
HHO1	ITR1	SPC98														SPC98
YKL033W-A	SPO12	LTE1														LTE1
HSL1	SUR7	YSY6														YSY6
ARG8	RAX2	SGO1														SGO1
HOM3	CGI121	PRI2														PRI2
ADO1	SML1	TKL2														TKL2
MSH6	HHT1	MPS3														MPS3
FPR1	HST3	VRG4														VRG4
SHC1	MCD4	CLN2														CLN2
HO	TOS2	PDC5														PDC5
RTK1	YIP3	YPS6														YPS6
YPR117W	ALG5	TOP2														TOP2
SWE1	HTZ1	SPS100														SPS100
GAP1	YOR389W	CDC21														CDC21
LYS2	BFA1	THI73														THI73
POL2	TUB2	THI6														THI6
RPS11B	SPC110	CGI121														CGI121
ARO1	SMC4	TDA6														TDA6
CPS1	DUO1	PMS1														PMS1
ARG3	RSR1	ARO4														ARO4
RAD27	DIG2	THI4														THI4
NQM1	ERP3	ERP2														ERP2
ERG3	YKL069W	PGM1														PGM1
AMD2	GAS1	YCG1														YCG1
IRC7	TCB2	ENO1														ENO1
PDS5	ALG14	YPK2														YPK2
MCD4	CDC45	FMP16														FMP16
LEU2	SMC3	TOF2														TOF2
DDR2	RAD51	NNR2														NNR2
PMT2	RBH2	RAD51														RAD51
HSP12	BNI5	SPC29														SPC29
TRP4	HTA1	DIF1														DIF1
SED1	MYO1	TUB2														TUB2
ALD6	TOP2	CDC11														CDC11
SAH1	POL30	BOI1														BOI1
HEK2	MSB2	HHF2														HHF2
PET18	MMR1	GIP1														GIP1
PAN2	ALG7	CTA1														CTA1
REC102	BUD3	SPI1														SPI1
IRR1	SLK19	ERP1														ERP1
URA1	HCM1	PGK1														PGK1
YNL284C-B	YLR112W	RNH203														RNH203
HTA2	ELO2	SSP2														SSP2
MEP3	ZDS2	PDS1														PDS1
MET1	TOF2	POL30														POL30
MET16	IRR1	CTT1														CTT1
MET22	MPS3	NFT1														NFT1
PUB1	BUD8	TDH1														TDH1
SCW10	SPC98	ECL1														ECL1
GAS3	YHR127W	SPC24														SPC24
LYS1	VRG4	NSE4														NSE4
CIN8	NDD1	SPC105														SPC105
GET3	SDC1	USV1														USV1
YCS4	DIF1	TDH2														TDH2
KAP95	CLB6	SBH1														SBH1
THI2	TOP3	MSC1														MSC1
HTA1	HTB1	OGG1														OGG1
WAR1	BBP1	SMC1														SMC1
TCB2	NUF2	SOL1														SOL1
AAP1	FIT2	GRE1														GRE1
ECM13	SPH1	ALG7														ALG7
URA5	SMC6	CTF18														CTF18
ECM32	SPC42	GCY1														GCY1
KDX1	YNL058C	AMS1														AMS1
ARO2	CTF18	MYO1														MYO1
ARG2	PTH4	BNI5														BNI5
PDR12	BNS1	TOS1														TOS1
STU2	POL12	MST27														MST27
CCR4	SPC34	RBH2														RBH2
TUB1	YPL278C	SRL1														SRL1
ACS2	LTE1	ALD3														ALD3
DUR1,2	SKM1	HCM1														HCM1
DIC1	TEL2	IDP2														IDP2
YOL107W	IPL1	NUF2														NUF2
MYO2	SPC19	SML1														SML1
KCC4	RNH203	CUE4														CUE4
RTG3	UTR2	ALG5														ALG5
RFC3	SPC24	SFG1														SFG1
ESBP6	YBR071W	RDI1														RDI1
ABP140	DAD3	HTB1														HTB1
BNA1	RPB11	YHP1														YHP1
PHO88	OST3	PSF3														PSF3
GCR1	SPC105	BFA1														BFA1
SPO24	CDC28	BET1														BET1
ECM33	CLB4	KCH1														KCH1
PMI40	YDL157C	GIC2														GIC2
SMC3	PXL1	HSP30														HSP30
CPA1	YCG1	POL12														POL12
GSC2	PSF3	ATG39														ATG39
TVP23	SPO1	JID1														JID1
CHO1	SIT1	SPO19														SPO19
ATR1	CHO1	CLB1														CLB1
NET1	SPT21	TEL2														TEL2
OLE1	PSD1	GND2														GND2
NAB3	PSY3	MTC7														MTC7
ELO2	MYO2	SPS22														SPS22
AQR1	SMX3	CYC7														CYC7
MCD1	CSM1	SMC6														SMC6
INM1	OGG1	HHF1														HHF1
NPL3	GNA1	VAC17														VAC17
RPL31B	YKE2	ECM9														ECM9
MCH1	YPT10	CDC28														CDC28
HEM15	CSE4	BUD4														BUD4
MDL2	NA	DUN1														DUN1
NDD1	BTT1	HTZ1														HTZ1
PRM5	YBR056W-A	CNM67														CNM67
HSP26	BUB1	AGX1														AGX1
HTB2	YLR042C	HHT1														HHT1
BIO2	KIN3	HOR7														HOR7
RPS22A	NSE4	NRM1														NRM1
XRN1	SPA2	KAR3														KAR3
SPC97	POL1	CSM3														CSM3
SAM1	SPC25	ALK2														ALK2
CKI1	CSM3	SPC42														SPC42
ORT1	ERP2	SDC1														SDC1
ATP17	MSH6	CSE4														CSE4
IRC23	MTW1	ACM1														ACM1
PHO3	LPX1	CSN9														CSN9
TYR1	RAD53	GIC1														GIC1
POL1	ESP1	DUO1														DUO1
BUD3	MIF2	SMC4														SMC4
SHO1	DPB2	RSR1														RSR1
KAP123	HEK2	DPB2														DPB2
SEN54	BET1	SHH3														SHH3
GND1	KCH1	PMT3														PMT3
BAT2	ERG4	INO1														INO1
MET4	HOS3	ZDS2														ZDS2
RIB1	BOI1	ESC8														ESC8
YBR012W-B	MKC7	CYB2														CYB2
QDR3	EXG2	YIP3														YIP3
PRY2	GTT3	SUT2														SUT2
PMT1	YOL019W	DAD2														DAD2
RPL37B	SBH1	CIT2														CIT2
MDM34	ESC8	SLK19														SLK19
BAG7	CDC3	FIR1														FIR1
ADR1	YOL107W	KIP1														KIP1
CDC45	HBN1	NCA3														NCA3
GEA1	CUE4	AXL2														AXL2
YBT1	ERP1	YKE2														YKE2
GNP1	IQG1	SOL4														SOL4
RFA2	SKG6	AIM34														AIM34
MPC2	RFC3	GNA1														GNA1
CLN1	CNM67	FLO10														FLO10
YGL114W	ECM9	BUB1														BUB1
HSP78	MIM2	WSC2														WSC2
YAP1801	PNP1	CAT2														CAT2
VID24	CTF3	PLM2														PLM2
GLY1	EST1	YOX1														YOX1
YHR214C-B	GWT1	GAS4														GAS4
STP22	PAC11	SIP18														SIP18
DAL7	SMC1	CRF1														CRF1
CSI2	TUB4	SPC19														SPC19
RFA3	YLR126C	SPS1														SPS1
SEC27	SCW4	ADY2														ADY2
POP1	PMS1	NUD1														NUD1
PSA1	CYC8	TOS2														TOS2
MAS2	PRI2	CIK1														CIK1
YJL213W	CPT1	GWT1														GWT1
STB4	ADK2	SPR2														SPR2
YDR341C	GRX6	FKH1														FKH1
RPS15	POL2	SPG1														SPG1
CLB5	DAD2	FCY22														FCY22
PCL1	RDI1	GTT3														GTT3
GIN4	IRC4	DAD3														DAD3
ERG6	YBR184W	SPT21														SPT21
SCP160	DUR3	UBC11														UBC11
MNN5	POC4	RTT109														RTT109
FDO1	YCR043C	RNH201														RNH201
ILV6	RPP1	THI72														THI72
ARG80	SAM2	YPT10														YPT10
TPN1	CDC11	COX26														COX26
SKG6	PMT3	SHE1														SHE1
ERV25	FMP16	RAD53														RAD53
RTT107	YNL203C	PSY3														PSY3
VHR1	CRF1	PTH4														PTH4
UNG1	HOR7	IPL1														IPL1
CPT1	CTT1	BTT1														BTT1
DAL80	CYB2	TAT1														TAT1
TAT2	YCR100C	PDC6														PDC6
ERP3	YDL183C	SMX3														SMX3
NCE102	HSP12	MOH1														MOH1
POS5	CIT2	RRT1														RRT1
ACO2	ALD3	CLB6														CLB6
MET10	TKL2	CIN2														CIN2
INH1	PGK1	YNR068C														YNR068C
SIM1	AMS1	YNR065C														YNR065C
PHO8	ASK10	YGL117W														YGL117W
TOM71	YNL115C	YIL024C														YIL024C
PST1	ATG39	YBR071W														YBR071W
YIG1	SMF1	YOL107W														YOL107W
ISU1	NA	YBR012W-B														YBR012W-B
SNG1	MSC1	YHR214C-B														YHR214C-B
CIS3	GAS4	YJL213W														YJL213W
BAT1	BAG7	YOL019W														YOL019W
GEM1	YJL133C-A	YFL013W-A														YFL013W-A
SPC98	USV1	YER053C-A														YER053C-A
ARE2	NFT1	YHR022C														YHR022C
MDM20	MTC7	YLR311C														YLR311C
MAE1	NQM1	YIL025C														YIL025C
LTE1	HOM3	YFL040W														YFL040W
YSY6	GIP1	YNL195C														YNL195C
SGO1	YBR012W-B	YOL024W														YOL024W
PRI2	YIL165C	YBR012C														YBR012C
RPL2A	YHR007C-A	YKR005C														YKR005C
SER3	GCY1	YOR102W														YOR102W
YJR154W	YJL213W	YLR410W-B														YLR410W-B
TPO2	SPI1	YNL194C														YNL194C
ISW1	YKR104W	YCL048W-A														YCL048W-A
TKL2	FCY22	YAR029W														YAR029W
TRP2	MOH1	YNR066C														YNR066C
MPS3	GPX1	YDR344C														YDR344C
VRG4	TAT1	YER160C														YER160C
SRL3	TDA6	YCR061W														YCR061W
PTR2	LEU2	YMR084W														YMR084W
CLN2	SOL1	YKR104W														YKR104W
RFA1	ARO4	YHR007C-A														YHR007C-A
RNR2	IDP2	YIL165C														YIL165C
MRC1	YNR065C	YNL115C														YNL115C
PDC5	YMR084W	YDL183C														YDL183C
TEP1	YCR061W	YCR100C														YNL203C
YPS6	NNR2	YNL203C														YLR126C
TOP2	YER160C	YLR126C														YCR100C
SSK22	THI72	YBR056W-A														YBR056W-A
GLG1	ADY2	YDL157C														YDL157C
FUR1	DDR2	YPL278C														YPL278C
ROT2	SOL4	YHR127W														YHR127W
SPS100	YPK2	YLR112W														YLR112W
CRG1	YDR344C	YKL069W														YKL069W
PMT4	AGX1	YOR114W														YOR114W
GPI13	YPR127W	YJL118W														YJL118W
ICY1	ISF1	YGR153W														YGR153W
CDC21	TDH1
YJR096W	YHR033W
GDS1	FMO1
MVD1	BSC5
SEC26	LYS20
GNT1	YNR066C
CTF4	YGP1
THI73	CAT2
CST6	YHR032W-A
CLB3	HXK1
YKE4	HXT4
YPL264C	YAR029W
THI6	JID1
NA	YHR214C-B
ETT1	COX26
TPO1	SPS1
MOG1	AIM33
YOL019W	FLO10
PIK1	YNR068C
MCH4	RTC2
PRO3	YKR012C
CGI121	GND2
VPS75	INM1
SRM1	STR3
TOF1	NCA3
ERG25	SPG1
HSP150	YIL024C
BAP3	YCL048W-A
BNI4	YDL218W
TDA6	YNL194C
CAF16	YLR410W-B
PMS1	HSP26
SWF1	YNL144C
THR4	ADH5
YIL165C	SPO19
RTS3	CTA1
ARO4	RGI1
THI4	SSA3
ERP2	PDR12
GTO1	YIL059C
MAL13	MST27
RDH54	YIG1
YLR152C	SSP2
SWI4	SNZ2
PGM1	ECL1
GDA1	THI2
POL5	FRE1
YCG1	ENO1
VPS28	YOR102W
YPR158W-B	TDH2
ENO1	YJL045W
CDC9	UBC11
MSB1	YKR005C
SGF73	YBL109W
INA1	PST1
SGF29	YLR466C-B
TIF1	CYC7
MRPL50	ATG41
YPK2	PDC1
PIF1	YLL066W-B
YBR085C-A	ECM13
ISA1	SNZ3
FMP16	YDR544C
THO2	YBR012C
MLC2	YOL024W
PET10	FMP23
TOF2	PMA2
YDL085C-A	SIP18
NNR2	YHR217C
ILM1	YGL117W
FAA4	YNL195C
SKN1	YNL338W
RAD51	CTR1
HRB1	YFL040W
RLF2	REC102
SPC29	SPS100
EMP24	YLR154W-F
PDE1	YRO2
DIF1	RRT1
DAL5	CTR2
TUB2	TAR1
DLD1	SHC1
CDC11	YPS6
BOI1	SPO21
HHF2	SUL1
YCR101C	SHH3
YJL107C	PIR3
MET28	GRE1
YNR066C	HBT1
GIP1	YLR154W-B
DED1	PDC6
COQ11	HSP30
CTA1	YIL025C
RPN4	YLR311C
SPI1	YLR154W-A
YPR053C	YHR022C
PBR1	YER053C-A
ERP1	SPR2
YET1	THI6
TRP5	YSW1
GPP1	RRT5
PGK1	PET18
RNH203	THI20
YMR090W	FET4
DOT1	YFL013W-A
SIR1	SPS22
CAF20	THI73
ILV3	THI7
SSP2	PHO3
GIP2	THI4
SAM4	PDC5
SLI15
YDR344C
SSA1
JEM1
GIS3
YKR005C
PDS1
POL30
CTT1
ASN2
IRC15
YOR302W
NFT1
ASP3-1
PPZ1
TDH1
BMT6
MIS1
HIS1
CPR7
ECL1
SPC24
PHM8
LAT1
IMD2
NAR1
YMC2
ELO3
SOD2
RHO3
RPC31
YJR149W
JSN1
NSE4
YER160C
SPC105
MSB3
USV1
TDH2
SBH1
MSC1
NRG1
OGG1
YDL183C
YHI9
YER053C-A
NVJ1
YMR045C
SMC1
JHD2
SOL1
GRE1
AAT1
CPR6
PEX21
ALG7
URE2
CTF18
GCY1
LEU9
SEC53
PSF2
SNO1
SSE2
KNH1
POL3
GSP2
ALT1
MSO1
CIA2
ELF1
ARF1
RKM1
GLG2
AMS1
ZRT2
KAP122
ADI1
MYO1
BNI5
YGL101W
MUD1
AAD3
PEX11
STB6
RKM3
MTO1
TOS1
MST27
CDS1
ACO1
YOR385W
RBH2
RRM3
HXT5
SRL1
AIM46
ALD3
HCM1
MSH2
YJL118W
KTR3
HPC2
YOR142W-B
IDP2
ASG7
NUF2
YDR133C
SHR5
GCN4
SOD1
SML1
YNL195C
CUE4
MRM1
POL32
TPH3
ALG5
CMR1
SFG1
FUS1
RDI1
LSB6
TCD2
HTB1
RDS1
MET6
RFC1
HSP31
GTO3
ATG8
YHP1
YJL206C
PUS9
PSF3
BFA1
VMR1
RER1
ELP6
BET1
KCH1
YDL199C
SRO77
GIC2
HSP30
ROG3
EFM4
CLD1
SEM1
RNP1
PXA2
FTR1
LIA1
POL12
NUP82
DLD3
ATG39
SPE3
YIH1
PMT7
JID1
SPO19
CLB1
SFH5
BAS1
TEL2
PCA1
MET7
ARE1
NCE103
VPS9
MRPL6
USB1
YCR061W
OAR1
GND2
PNS1
RPS14B
MTC7
SPS22
YDL206W
ASI3
CYC7
AEP3
ERV41
YCR007C
SMC6
CUP9
EUG1
FPR2
YBL086C
YKL023W
YEL073C
GDT1
RPL7B
RPL12B
MUP3
ENB1
DAL3
HHF1
VAC17
YKR104W
YHR127W
POR1
RTC3
ECM9
OPI1
YMR253C
SET2
ATG38
CDC28
BUD4
AAD10
CDC10
GUK1
MTL1
AIM45
PFK26
REX2
YER079W
UPS1
HTD2
DUN1
HTZ1
CNM67
AGX1
HIF1
YEL045C
YNL115C
EMC6
HHT1
AAH1
HOR7
XBP1
INO4
GPM2
CAB1
DON1
YLL058W
OPI3
NRM1
COQ9
YJR120W
SDS24
KAR3
YAR029W
PUT1
IST3
YIL152W
YGL214W
YPR145C-A
CSM3
YBR230W-A
YHR022C
RIM1
YDR340W
YIL002W-A
ALK2
SPC42
PRM9
YAR028W
SDC1
SUL2
CSE4
ACM1
TYW3
DUT1
LIP1
COA6
RPL22B
YNL194C
MTQ2
YGR153W
ATP6
CSN9
GIC1
PTP2
PDR15
DUO1
YLR311C
HLR1
EMP46
SMC4
SRB7
RSR1
PUT4
AFR1
DPB2
YNL203C
CMK1
YDL121C
UTP30
PNC1
CFD1
MIC12
FUS2
SPO23
LSM5
AGP2
YDL157C
YCL002C
SUE1
SNN1
SFM1
HSP42
COQ4
CTF19
Q0255
EMI2
YCR100C
SHH3
RRT8
PMT3
LAM5
MEF2
INO1
RPL9A
GCD10
ZDS2
RKM4
ESC8
SME1
LAG2
XPT1
RCR1
ARO9
ERP5
YIL156W-A
POP5
RNY1
YPQ1
CYB2
YIP3
MPS2
RTC6
NDT80
TOS3
YKL069W
SUT2
VTC5
MET2
GAD1
YHL044W
BIL1
BTN2
LMO1
SPR3
DAD2
CHZ1
CIT2
YOR338W
SAP4
GRX2
SLK19
PEX2
FIR1
KIP1
AIM4
YOL024W
ARO7
SGD1
YOR114W
YBL010C
DCS2
PHM7
YPL247C
NCA3
OLI1
AXL2
YKE2
NDE2
YHR007C-A
SOL4
NNT1
RIP1
MND1
YFL040W
AIM34
VBA1
TIM8
CMK2
GNA1
RTN2
FLO10
GEP4
PIR5
ECM18
YLR053C
BUB1
YJL144W
WSC2
CAT2
PLM2
RPC25
RPL38
YOX1
SDA1
CBP6
YIL077C
COX17
GAS4
YHK8
SIP18
APT1
NNR1
HSP104
CRF1
FIG2
YCT1
LPP1
SWC7
YCL048W-A
FMP45
YIL025C
GRE3
CYC1
SPC19
SPS4
PDR18
SPS1
VHS3
VFA1
BNR1
YDR381C-A
UIP3
ADY2
YPC1
NUD1
COX3
YPL278C
TOS2
HIS6
NA
MCP1
PHO84
CIK1
YBR144C
GWT1
SPR28
SPB4
UBC5
AIM17
DIA3
ZTA1
RTT105
FRT2
YLR126C
RSB1
PRR2
SPR2
FKH1
AGA1
CHL4
YSR3
SRL4
MIX14
PBI1
MEI4
PIC2
SPG1
FIT3
MRPL39
CAR1
YML108W
FCY22
GTT3
YBL028C
YLR410W-B
CMC2
DAD3
HFM1
LIN1
YMR099C
SPT21
ATO3
NDJ1
YBR012C
YOL163W
ALG13
SDD2
HUL4
UBC11
SWC5
RTT109
YMR103C
RNH201
THI72
LAC1
IGD1
YPT10
HUB1
PUG1
GMC2
FYV1
SNO4
COX26
YKL071W
YIL055C
SPR1
SHE1
YFL013W-A
RAD53
YDR246W-A
YDR018C
SIP4
YPT35
VBA2
YLL047W
YNR071C
YDR170W-A
SYM1
PSY3
MUM3
KEI1
PTH4
MAK31
IPL1
CRR1
ACS1
CSR2
HXT2
YLR036C
OST5
PET191
URM1
BTT1
YMR084W
YOR186W
YOL014W
MBR1
YHL037C
TAT1
WIP1
PDC6
YGR066C
OSW2
SPO11
FRM2
SGA1
SPT4
CWC15
AAD14
JLP1
NA
ZIP2
YFL019C
YJL047C-A
YBR285W
YLR030W
FRE7
SMX3
MOH1
YMR085W
YMR230W-A
YEL028W
RRT1
IMA2
XYL2
EGO4
BSC1
RIM9
HIM1
YOL166C
YOR050C
SEN34
YLL056C
FIT1
GTT2
YGL258W-A
YPS5
YLR460C
ATX1
RSM27
YLR112W
RPL41A
YER068C-A
YMR252C
YER175W-A
CTR3
YER039C-A
CLB6
HUR1
POX1
PAU17
YPT53
THI11
YIL028W
YLR285C-A
VEL1
FRE4
REC104
YAL037C-B
OYE3
CRC1
SEN15
SLZ1
MCH2
RIF2
YOR381W-A
YDR169C-A
IES2
GOT1
YIL086C
RGI2
SPO13
SPG4
HVG1
LDS2
YDR401W
YOR102W
MPC54
ARR3
YLR361C-A
HOP1
POT1
PAU5
SSP1
YJL211C
GAL7
SHH4
YKL169C
CSS3
YHR054C
YOR392W
DIT2
PES4
PCH2
COX7
CIS1
YPR150W
MAL33
ERR3
YIL029C
YOL162W
ALP1
PAU23
YER046W-A
YLR031W
REC8
YGL235W
CIN2
YMR315W-A
YBR056W-A
IMA3
YFL041W-A
FAT3
YIL134C-A
YBR027C
PRM3
YDR182W-A
SPL2
GAL4
YPR123C
YOL099C
BOP2
YGR064W
YNL171C
YDR366C
SFC1
FRE2
FLO11
DAK2
